# Supplementary material for: Is there genetic variation in mycorrhization of Medicago truncatula?
Source: PubMed Central journal article supplement (PMC5592082; doi:10.7717/peerj.3713), 2017-09-07
Supplement: peerj-05-3713-s001.pdf [file peerj-05-3713-s001.pdf]

**Table S1:** List of the 33 accessions analyzed in this study

| Hapmap ID        | Line No*  | Population of origin (accession) | Country of origin | Category              |
|------------------|-----------|----------------------------------|-------------------|-----------------------|
| HM000<br>(HM101) | A17_Varma | A17                              | NA                | Doug Cook<br>UC Davis |
| HM001            | L000163   | SA22322                          | Syria             | CC8                   |
| HM002            | L000174   | SA28064                          | Cyprus            | CC8                   |
| HM003            | L000544   | ESP105-L                         | Spain             | CC8                   |
| HM004            | L000736   | DZA045-6                         | Algeria           | RILParent/CC8         |
| HM005            | L000734   | DZA315-16                        | Algeria           | RILParent/CC8         |
| HM006            | L000530   | F83005-5                         | France            | RILParent/CC8         |
| HM007            | L000651   | Salses71B                        | France            | CC8                   |
| HM008            | L000368   | DZA012-J                         | Algeria           | CC8                   |
| HM009            | L000555   | GRC020-B                         | Greece            | CC16                  |
| HM010            | L000154   | SA24714                          | Italy             | CC16                  |
| HM011            | L000543   | DZA327-7                         | Algeria           | CC16                  |
| HM012            | L000239   | SA26063                          | Morocco           | CC16                  |
| HM013            | L000648   | Salses42B                        | France            | CC16                  |
| HM014            | L000542   | DZA233-4                         | Algeria           | CC16                  |
| HM015            | L000550   | F11013-3                         | France            | CC16                  |
| HM016            | L000049   | SA09707                          | Tunisia           | CC16                  |
| HM031            | L000545   | ESP158-A                         | Spain             | CC32                  |
| HM032            | L000549   | F11005-E                         | France            | CC32                  |
| HM033            | L000552   | F20047-A                         | France, Corsica   | CC32                  |
| HM034            | L000554   | F20089-B                         | France, Corsica   | CC32                  |
| HM035            | L000679   | F66017                           | France            | CC32                  |
| HM036            | L000337   | GRC042-1                         | Greece            | CC32                  |
| HM037            | L000557   | GRC064-B                         | Greece            | CC32                  |
| HM038            | L000369   | PRT180-A                         | Portugal          | CC32                  |
| HM039            | L000263   | SA03116                          | Israel            | CC32                  |
| HM040            | L000321   | SA03780                          | Italy             | CC32                  |
| HM041            | L000198   | SA09048                          | Libya             | CC32                  |
| HM042            | L000290   | SA09119                          | Turkey            | CC32                  |
| HM043            | L000310   | SA09944                          | Tunisia           | CC32                  |
| HM044            | L000245   | SA14161                          | Jordan            | CC32                  |
| HM045            | L000144   | SA14163                          | Jordan            | CC32                  |
| HM046            | L000213   | SA27882                          | Morocco           | CC32                  |

\*All line numbers used in the text were abbreviated and contained the last three numerals only.
