# Supplementary material for: Is there genetic variation in mycorrhization of Medicago truncatula?
Source: PubMed Central journal article supplement (PMC5592082; doi:10.7717/peerj.3713), 2017-09-07
Supplement: peerj-05-3713-s002.pdf [file peerj-05-3713-s002.pdf]

Table S2: Summary of two-factorial ANOVA comparing ecotypes and treatments (shown in Fig. 1)

|                       | Df  | Sum Sq | Mean Sq | F value | Pr (>F)          |
|-----------------------|-----|--------|---------|---------|------------------|
| Factor 1 (ecotypes)   | 32  | 16128  | 504     | 1.856   | 0.00477 **       |
| Factor 2 (treatments) | 3   | 133637 | 44546   | 164.033 | $< 2e^{-16}$ *** |
| Factor1:Factor2       | 96  | 22796  | 237     | 0.874   | 0.77639          |
| Residuals             | 263 | 71421  | 272     |         |                  |
